# Supplementary material for: RuO2@Co3O4 heterogeneous nanofibers: a high-performance electrode material for supercapacitors
Source: Royal Society of Chemistry journal article supplement (doi:10.1039/c6ra04884f), 2016-01-01
Supplement: c6ra04884f1.pdf [file c6ra04884f1.pdf]

## Electronic Supplementary Information (ESI)

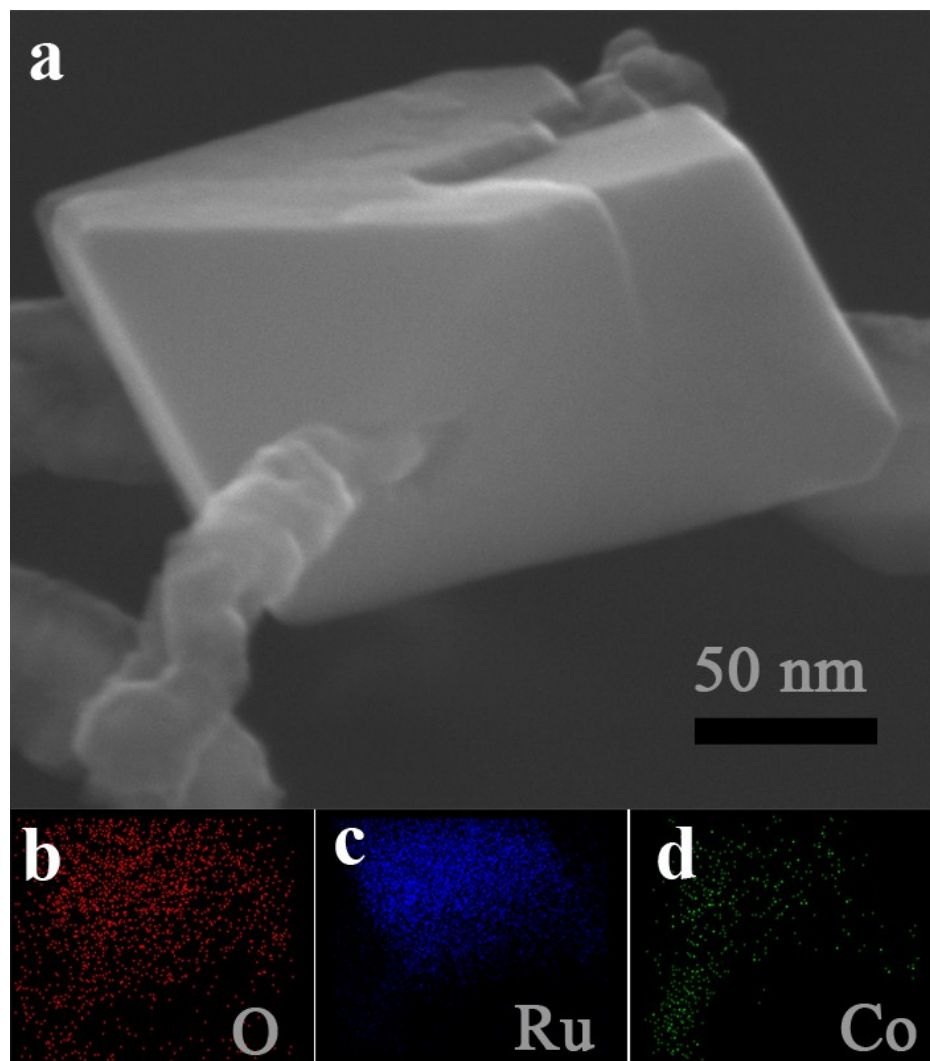

**Figure S1.** (a) FE-SEM image of  $\text{RuO}_2@\text{Co}_3\text{O}_4$  HNFs; (b, c and d) Corresponding EDS mapping with elements O, Ru and Co.

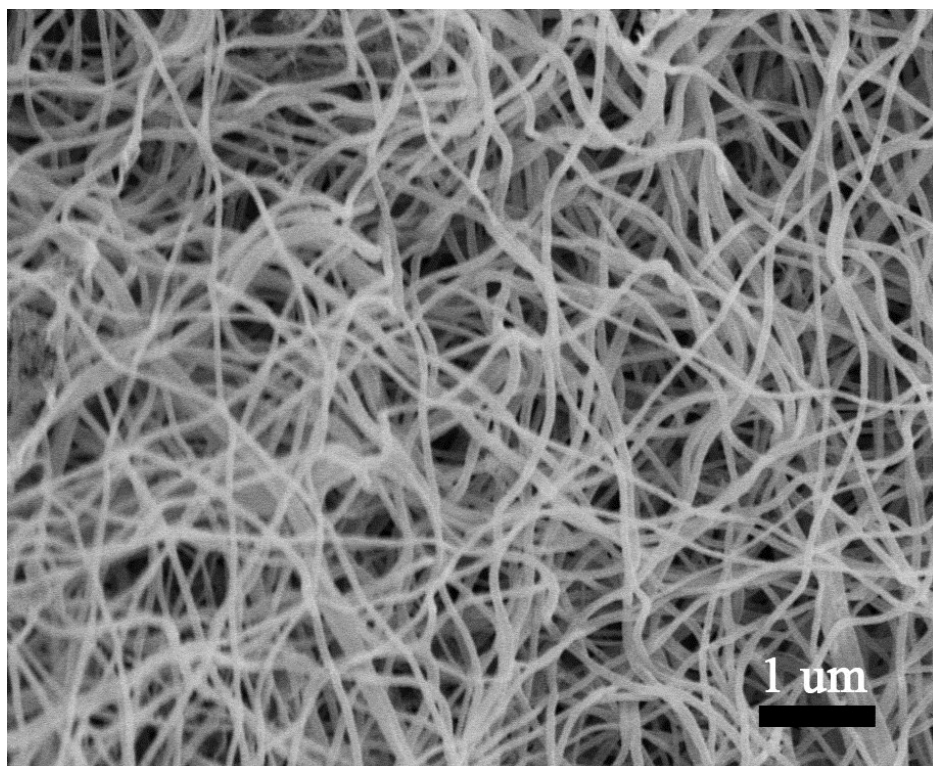

**Figure S2.** FE-SEM image of the pure  $\text{Co}_3\text{O}_4$  NFs.

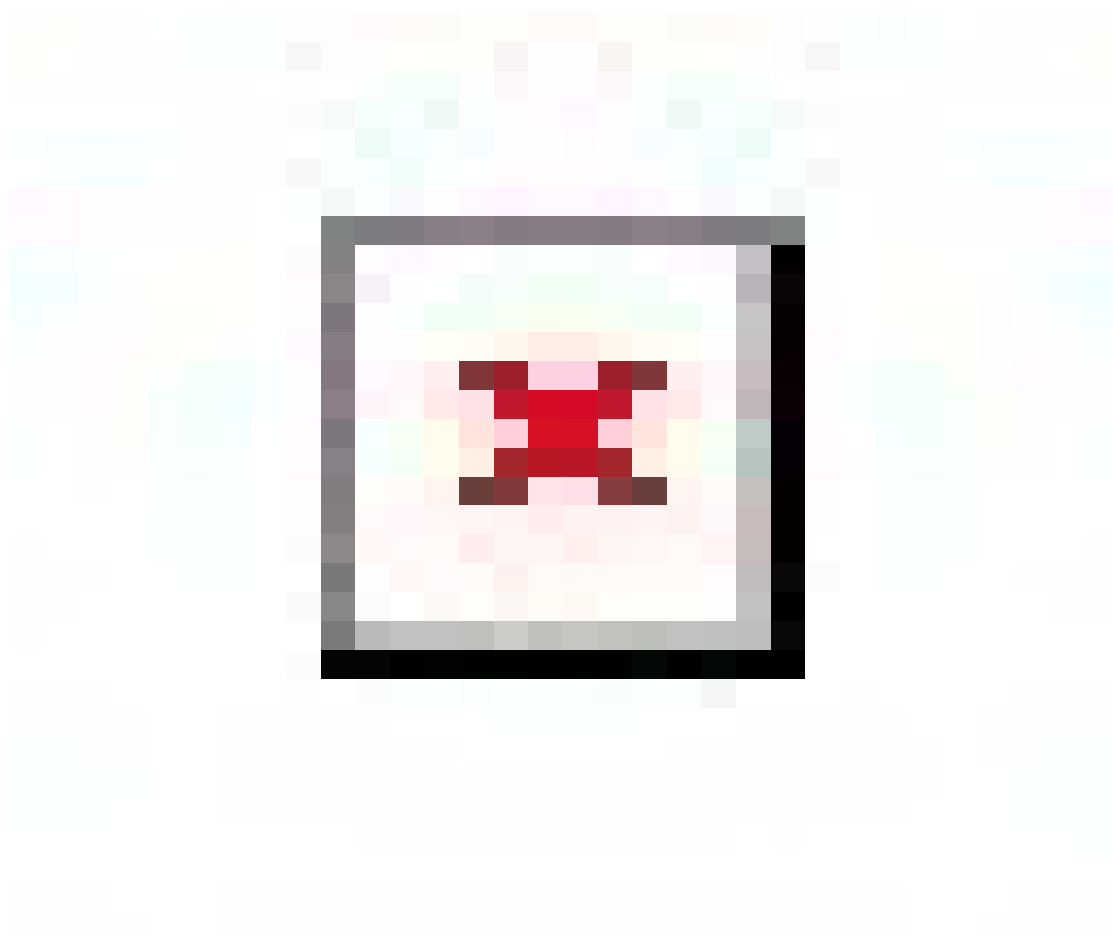

**Figure S3.** XRD patterns of the pure Co<sub>3</sub>O<sub>4</sub> NFs.

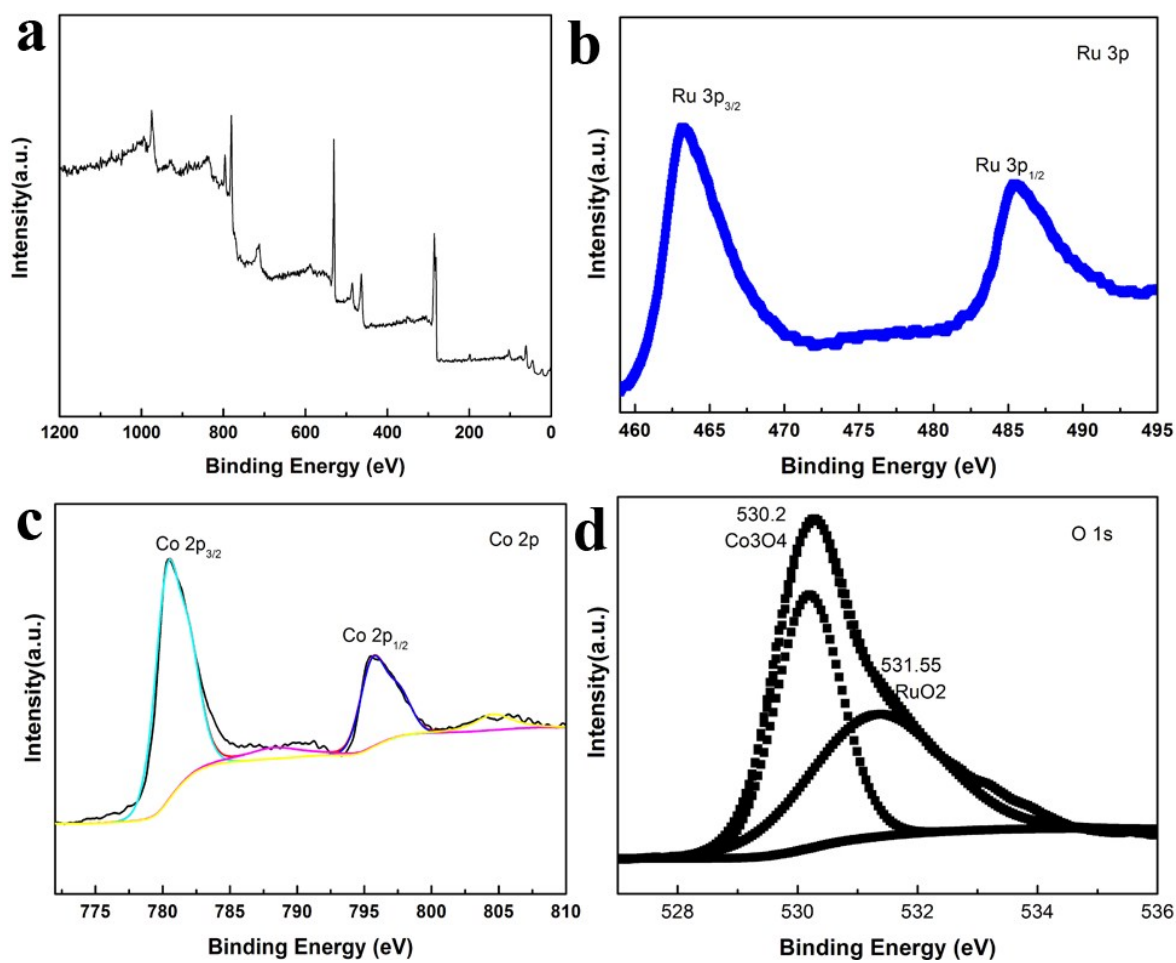

**Figure S4.** (a) XPS general spectra of the RuO<sub>2</sub>@Co<sub>3</sub>O<sub>4</sub> HNFs and deconvoluted (b) Ru 3p, (c) Co 2p and (d) O 1s spectra.

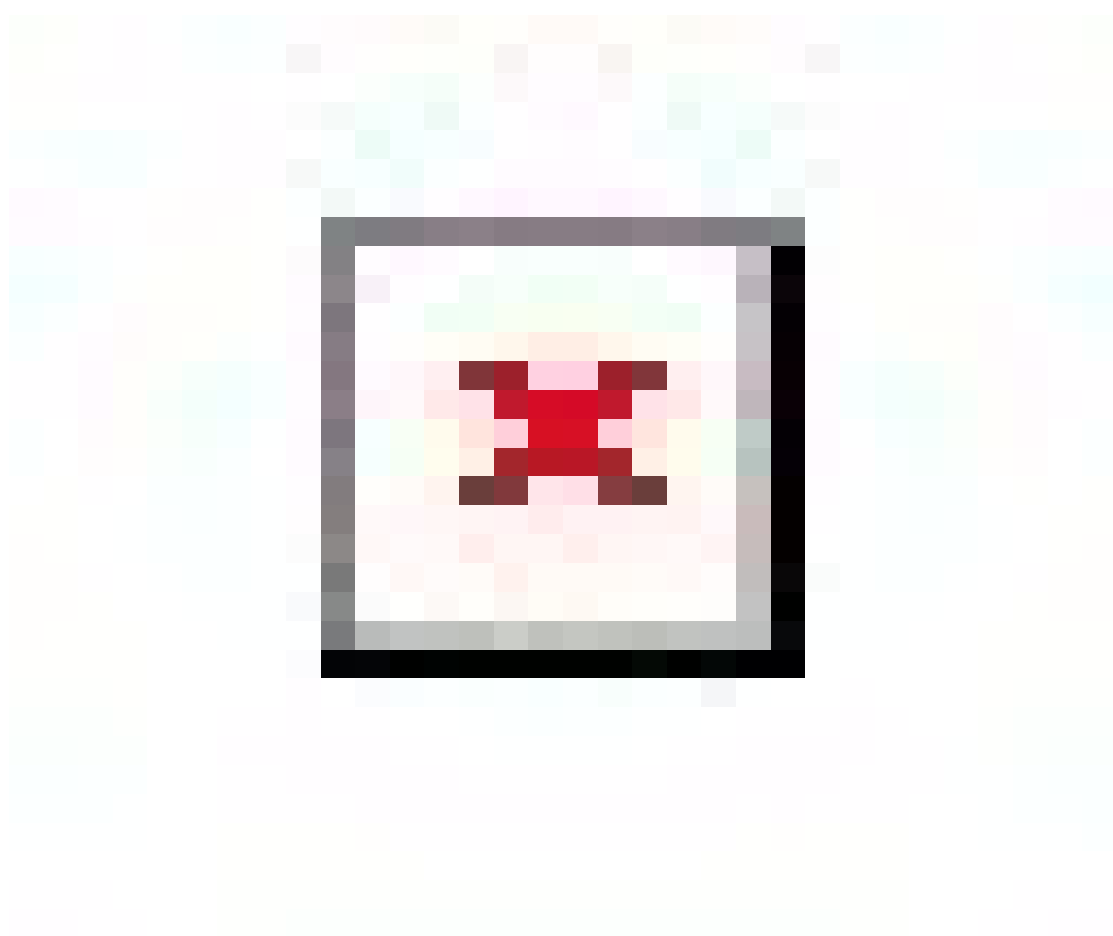

**Figure S5.** XRD patterns of as-prepared RuO<sub>2</sub>@Co<sub>3</sub>O<sub>4</sub> HNFs composite calcined at 350 and 450 °C.

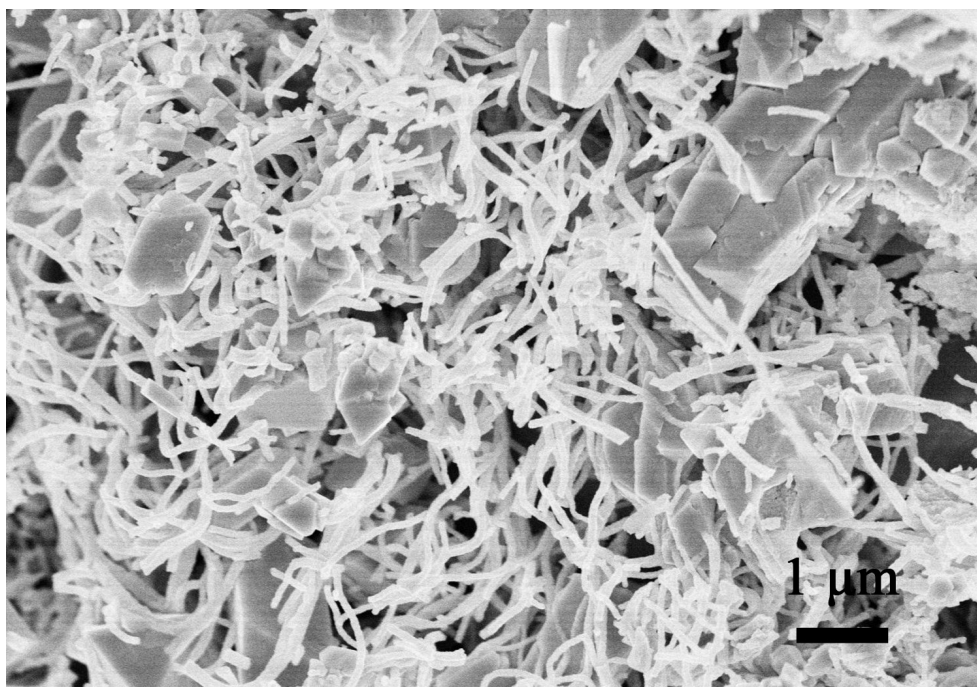

**Figure S6.** FE-SEM image of  $\text{RuO}_2@\text{Co}_3\text{O}_4$  HNFs with high atomic ratio of Ru: Co.

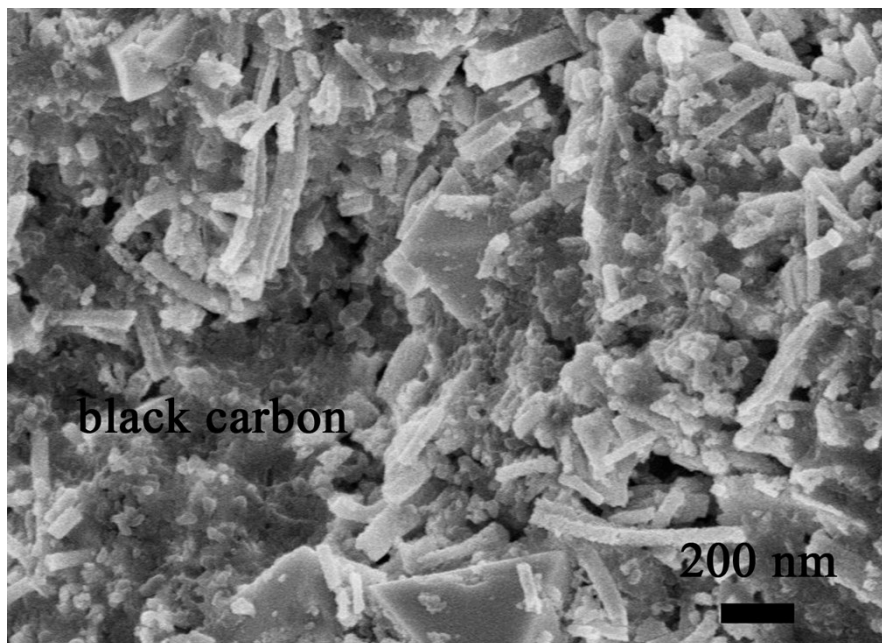

**Figure S7.** FE-SEM image of the  $\text{RuO}_2@\text{Co}_3\text{O}_4$  HNFs after cycling test.
